# Supplementary material for: Glacier variations in the Himalaya from 1990 to 2015 based on remote sensing
Source: Copernicus journal article supplement (doi:10.5194/tc-2019-297), 2020-04-23
Supplement: Supplementary file [file tc-2019-297-AC2-supplement.pdf]

Dear Anonymous Referee,

Many thanks for your comments. We also clarified the objectives in the revised manuscript and corrected grammar and wording by a native speaker. In addition, we edited the introduction and study area according to your suggestion.

Best wishes

Qin Ji
