# Supplementary material for: Glacier variations in the Himalaya from 1990 to 2015 based on remote sensing
Source: Copernicus journal article supplement (doi:10.5194/tc-2019-297), 2020-04-23
Supplement: Supplementary file [file tc-2019-297-AC6-supplement.pdf]

Q1: Please forward the study to a native speaker for proof-reading and correction before re-submitting it.

A1: Thanks you very much for your comments suggesting our manuscript entitled “Glacier variations in the Himalayas from 1990 to 2015 based on remote sensing”. We have corrected grammar and wording by a native speaker.

Q2: Please also note that the cited references and datasets are partly very old and outdated. For example, since several years the 30 m SRTM1 and GDEM2 are available and there is also the ALOS AW3D30 DEM. Moreover, the GAMDAM2 inventory by Sakai (2019)\* is providing an excellent glacier outline dataset for entire High Mountain Asia, but the study is not even cited.

A2: Many thanks for your advice, but we can't find the article about the GAMDAM2 inventory by Sakai (2019), can you send us the title of article or published journal? Many thanks again.

Q3: From Fig. 5 and 7 I see that several smaller glaciers have not been mapped. Such random omissions need to be explained.

A3: Several smaller glaciers have not been mapped in Fig. 5 and 7, and we explained it in the revised manuscript in lines 194-202.

Q4: As a minor point, please also improve the layout by inserting empty lines before section headings and before/after figures and tables if a re-submission is considered.

A4: We have revised the manuscript according to the Referee's comments in the revised manuscript. Many thanks again.

Best wishes

Qin Ji
